1       **Changes of oscillatory and aperiodic neuronal activity in working memory**  
2                   **following anaesthesia: a prospective observational study**

3

4   Janna D. Lendner<sup>\*1,2</sup>, Ulrich Harler<sup>3</sup>, Jonathan Daume<sup>4</sup>, Andreas K. Engel<sup>4</sup>, Christian  
5   Zöllner<sup>3</sup>, Till R. Schneider<sup>\*4</sup>, Marlene Fischer<sup>\*3,5</sup>

6

7   <sup>1</sup> *Dept. of Anaesthesiology and Intensive Care Medicine, University Medical Centre Tübingen, 72076*  
8   *Tübingen, Germany*

9   <sup>2</sup> *Hertie Institute for Clinical Brain Research, 72076 Tübingen, Germany*

10   <sup>3</sup> *Dept. of Anaesthesiology, University Medical Centre Hamburg-Eppendorf, 20246 Hamburg, Germany*

11   <sup>4</sup> *Department of Neurophysiology and Pathophysiology, University Medical Center Hamburg-*  
12   *Eppendorf, 20246 Hamburg, Germany*

13   <sup>5</sup>*Department of Intensive Care Medicine, University Medical Centre Hamburg-Eppendorf, 20246*  
14   *Hamburg, Germany*

15   \* These authors contributed equally to this work

16

17   **Corresponding author**

18   Janna D. Lendner. Email: [janna.lendner@med.uni-tuebingen.de](mailto:janna.lendner@med.uni-tuebingen.de)

19

20   **Short title**

21   Neurophysiology of postoperative cognitive function

22

23   **Keywords**

24   Aperiodic activity, 1/f, spectral slope, EEG, neuropsychology, oscillations,  
25   perioperative cognitive disorders, working memory, general anaesthesia

26 **Abstract**

27 **Background:** Anaesthesia and surgery can lead to cognitive decline, especially in the  
28 elderly. However, to date, the neurophysiological underpinnings of perioperative  
29 cognitive decline remain unknown.

30 **Methods:** We included male patients, who were 60 years or older scheduled for  
31 elective radical prostatectomy under general anaesthesia. We obtained  
32 neuropsychological (NP) tests as well as a visual match-to-sample working memory  
33 (WM) task with concomitant 62-channel scalp electroencephalography (EEG) before  
34 and after surgery.

35 **Results:** A total number of 26 patients completed neuropsychological assessments  
36 and EEG pre- and postoperatively. Behavioural performance declined in the  
37 neuropsychological assessment after anaesthesia (total recall; *t*-tests:  $t_{25} = -3.25$ ,  
38 Bonferroni-corrected  $p = 0.015$   $d = -0.902$ ), while WM performance showed a  
39 dissociation between match and mis-match accuracy (*rmANOVA*: match\*session  $F_{1,25}$   
40  $= 3.866$ ,  $p = 0.060$ ). Distinct EEG signatures tracked behavioural performance: Better  
41 performance in the NP assessment was correlated with an increase of non-oscillatory  
42 (aperiodic) activity, reflecting increased cortical activity (*cluster permutation tests*: total  
43 recall  $r = 0.66$ ,  $p = 0.029$ , learning slope  $r = 0.66$ ,  $p = 0.015$ ), while WM accuracy was  
44 tracked by distinct temporally-structured oscillatory theta/alpha (7 – 9 Hz), low beta  
45 (14 – 18 Hz) and high beta/gamma (34 – 38 Hz) activity (*cluster permutation tests*:  
46 matches:  $p < 0.001$ , mis-matches:  $p = 0.022$ ).

47 **Conclusions:** Oscillatory and non-oscillatory (aperiodic) activity in perioperative scalp  
48 EEG recordings track distinct features of perioperative cognition. Aperiodic activity  
49 provides a novel electrophysiological biomarker to identify patients at risk for  
50 developing perioperative neurocognitive decline.

## 51 **Introduction**

52 Postoperative cognitive impairment after surgery and anaesthesia includes  
53 postoperative delirium (POD)<sup>1</sup>, delayed neurocognitive recovery (DNCR) and  
54 postoperative neurocognitive disorders<sup>2, 3</sup>, all of which are associated with increased  
55 morbidity and mortality.<sup>1-3</sup> Elderly patients above 60 years are at high risk<sup>2, 4, 5</sup> to suffer  
56 from perioperative cognitive decline with incidences of up to 25 %.<sup>3</sup> Several cognitive  
57 domains such as attention, memory, and executive functions can be affected by  
58 DNCR.<sup>6</sup> Working memory (WM) maintenance is one function that may be affected  
59 postoperatively even in the long term, which has been shown in both animal and  
60 human studies.<sup>7-9</sup> Neurophysiological studies in healthy human participants showed  
61 specific patterns of oscillatory neuronal activity in several frequency bands during the  
62 maintenance interval of WM tasks.<sup>10-13</sup> Therefore, this study aimed at investigating the  
63 changes of oscillatory activity before and after general anaesthesia for elective non-  
64 cardiac surgery in a visual WM task.

65 In addition to changes in oscillatory neuronal activity after surgery, we examined  
66 the modulation of aperiodic neuronal activity, which can be quantified by the spectral  
67 slope of the  $1/f^x$  exponential function of the power spectrum (PSD).<sup>14</sup> Recent evidence  
68 demonstrated that aperiodic activity contains rich information about the current  
69 behavioural state. It is related to arousal in sleep and anaesthesia,<sup>15-18</sup> but also  
70 modulated during various cognitive tasks such as attention and working memory.<sup>18, 19</sup>

71 To address these outstanding questions, we recorded both a cognitive  
72 neuropsychological (NP) test battery, as well as a visual WM task with simultaneous  
73 whole-head 62-channel scalp EEG before and after general anaesthesia in patients  
74 undergoing radical prostatectomy to assess 1) perioperative cognitive performance  
75 and 2) concomitant alterations of electrophysiological patterns. Specifically, we

76 hypothesized that anaesthesia alters oscillatory activity in the theta, alpha and beta  
77 band, as these frequencies showed pronounced changes during WM maintenance.<sup>20</sup>  
78 In addition, we examined aperiodic activity, as measured by the spectral slope of the  
79 power spectrum<sup>15-17</sup>, across pre- and postoperative sessions and investigated how  
80 oscillatory and aperiodic electrophysiological signatures, relate to cognitive  
81 performance.

82

83

## 84 **Material and Methods**

85

### 86 ***Ethics approval***

87           The study protocol was approved by the local ethics committee of the Hamburg  
88 Chamber of Physicians (protocol number PV4782; 27.04.2016). All study participants  
89 gave written informed consent before the initiation of study-related procedures.

90

### 91 ***Design, setting and participants***

92           This prospective observational study was performed at a high-volume prostate  
93 cancer centre in Northern Germany. Between June 2016 and July 2017, we included  
94 a convenience sample of patients aged 60 years or older, who spoke German fluently  
95 and were scheduled for robot-assisted radical prostatectomy. Patients with pre-  
96 existing cognitive impairment or cerebrovascular disease were excluded. Study  
97 participants completed a neuropsychological (NP) assessment for cognitive function  
98 and performed a WM task on the day before surgery *and* on one day post-surgery (2<sup>nd</sup>-  
99 4<sup>th</sup> day). For details on data collection and anaesthesiologic management see  
100 Supplementary Information.

101

### 102 ***Neuropsychological Assessment***

103           The NP test battery included the California Verbal Learning Test (CVLT), the  
104 Trail Making Test (TMT), the Grooved Pegboard test (GPT) and the Digit Span  
105 Forward Test (DS; **Fig. 1**). To obtain standardized test scores for each subtest of the  
106 CVLT, we calculated the difference between pre- and postoperative scores for each  
107 patient and divided the result by the baseline standard deviation (SD). For the TMT,  
108 the GP and the DS z-scores were calculated accordingly after subtracting the practice

109 effect. A negative z-score for CVLT total recall, CVLT learning slope as well as the digit  
110 span (and a positive z-score for TMT-B and DS) indicated a worse performance in the  
111 second compared to the first session.

112

### 113 ***Working Memory Task***

114 For the assessment of task-related electrophysiologic changes, we chose a WM  
115 task, since impairment in WM has been implicated in perioperative cognitive  
116 disorders.<sup>21–23</sup> Pre- and postoperative sessions consisted of two conditions – a visual  
117 delayed match-to-sample task (memory condition) as well as a non-mnemonic visual  
118 discrimination task (control condition) as described previously.<sup>20</sup> Stimuli were black  
119 and white line drawings of natural objects (**Fig. 1**).<sup>24</sup> In a total of 8 blocks (4 of each  
120 memory and control) with 52 trials each, patients completed 416 trials (208 of each  
121 condition) consisting of unique sample/probe pairs (task details see Supplemental  
122 Information).<sup>20</sup>

123

### 124 ***Behavioural data analysis***

125 Reaction time (RT in seconds) and accuracy (AC between 0 and 1, where 1  
126 equals 100%) were determined for every condition and session (session 1 – before,  
127 session 2 – after anaesthesia; condition – memory or control). Memory performance  
128 was further split into match ( $RT_{Match}/AC_{Match}$ ) and non-match trials ( $RT_{Non-Match}/AC_{Non-}$   
129  $Match$ ) and then averaged across trials. Performance differences between matches and  
130 non-matches were calculated by subtracting the second from the first session.

131

132

133 ***Electroencephalography***

134 EEG data was recorded during the working memory and the control task from  
135 an equidistant 62 electrode scalp montage montage (Easycap, Herrsching, Germany)  
136 with two additional electrooculography (EOG) channels below the eyes and referenced  
137 against the tip of the nose. EEG was recorded with a passband of 0.016-250 Hz and  
138 stored with a sampling rate of 1000 Hz using BrainAmp amplifiers (BrainProducts,  
139 Gilching, Germany) in a dimly lit, sound-attenuated recording room.

140

141 ***Electrophysiological data analysis***

142 Data analysis was performed using Matlab R2018b (The MathWorks, Inc.,  
143 Natick, Massachusetts, United States) and the FieldTrip<sup>25</sup> toolbox (version 20172908)  
144 as well as custom code. For pre-processing, electrophysiological data was notch-  
145 filtered to remove line noise in 0.1 Hz steps (bandstop filter; 49 to 51 and 99 to 101  
146 Hz) as well as high- (0.1 Hz) and lowpass-filtered (100 Hz). Data was then averaged  
147 using a common median reference excluding the two EOG channels.  
148 Electrophysiological data was epoched into 5-second segments time-locked to sample  
149 onset (-1 to +4 s).

150 Trials containing jumps or strong artifacts were detected using FieldTrip<sup>25</sup>  
151 (ft\_rejectvisual) and rejected after visual inspection. Next, independent component  
152 analysis (fastica<sup>26</sup>) was used to remove eye-blinks, horizontal eye-movements,  
153 electrocardiogram artifacts or broadband noise based on the component spectrum,  
154 topography and time course.

155

156

157 ***Spectral power analysis***

158 Time-frequency decomposition was performed on epoched data using a sliding  
159 window Fast Fourier Transformation (*mtmconvo*<sup>25</sup>) between -0.5 to 3.5 seconds in 50  
160 ms steps and in the frequency range from 1 to 40 Hz in 1 Hz steps using a 500 ms  
161 Hanning taper with 50 % overlap. Each trial was then z-scored to a bootstrapped  
162 baseline (-500 to 0 ms) using a permutation approach (pooled baseline of all trials per  
163 channel; 1000 iterations).

164

165 ***Spectral slope analysis***

166 Calculation of spectral slope was performed on the PSD (settings see above)  
167 between 30 to 40 Hz, in line with recent work.<sup>15</sup> For each channel and trial, we obtained  
168 a first-degree polynomial fit to the power spectra in *log-log* space (*polyfit.m*, MATLAB  
169 and Curve Fitting Toolbox Release R2018b, The MathWorks, Inc., Natick,  
170 Massachusetts, United States).

171

172 ***Statistical analysis***

173 For statistical comparison of behavioural data, we employed dependent  
174 samples t-tests. All significant results were Bonferroni-corrected for multiple  
175 comparisons, if not stated otherwise. Effect size was calculated using Cohen's d. To  
176 determine the influence of conditions, sessions and trials type on behaviour, we utilized  
177 Greenhouse-Geisser corrected 2-way repeated measures analysis of variance (RM-  
178 ANOVA). To assess the spatial extent of the observed effects in EEG, we calculated  
179 cluster-based permutation tests to correct for multiple comparisons as implemented in  
180 FieldTrip<sup>25</sup> (Monte-Carlo method; maxsum criterion; 1000 iterations) reporting p- as  
181 well as the sum of t-values. A permutation distribution was obtained by randomly



182 shuffling condition labels. Spatial clusters are formed by thresholding dependent  
183 samples t-tests between control and memory as well as memory between sessions at  
184 a p-value  $< 0.05$  for the comparisons of ERP (**Fig. S5**), power (**Fig. 3**) and spectral  
185 slope (5000 iterations; **Fig. 5**). To assess the spatial extent of a correlation between  
186 WM/NP behaviour and power/slope differences between memory sessions in the delay  
187 period (0.3 to 3.1 s; **Fig. 4, 5**), we used rank correlations at a p-value of  $< 0.05$  for the  
188 cluster test. To control for an influence of WM behaviour on the NP-slope association,  
189 we utilized a partial correlation that partialled accuracy out before computing the  
190 correlation. The results of this analysis should be regarded as hypothesis generating.

191

192

193 **Results**

194 A total of 41 male patients (for patient characteristics see **Table 1, S2**) were  
 195 included in this study (flow chart see **Fig. S1**). Data analysis focused on 26 patients  
 196 that completed both neuropsychology (NP) and working memory (WM) sessions pre-  
 197 and post-operation, of whom seven fulfilled definition of DNCR (26.92 %).  
 198 Demographic and clinical data of study participants including, who did not complete  
 199 the postoperative assessments, are presented in Table S2.

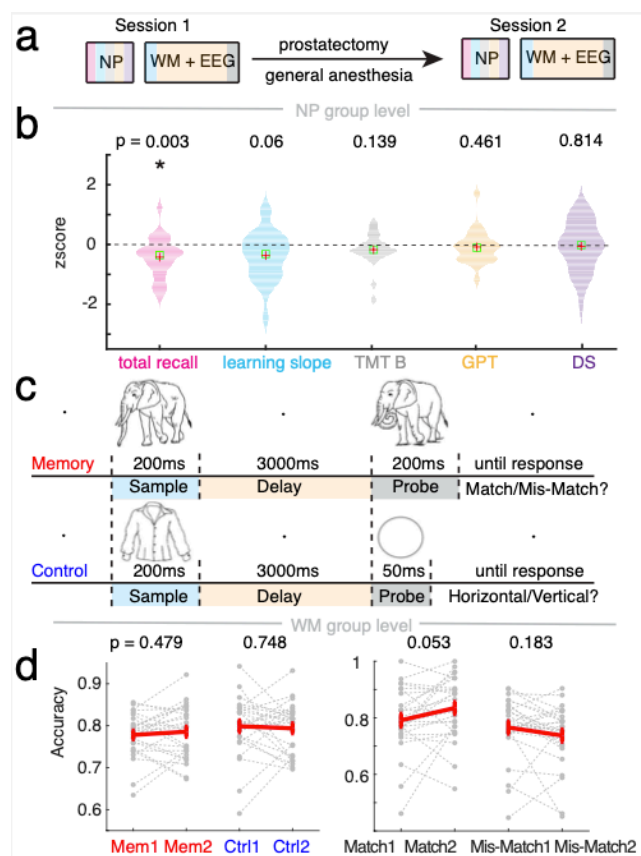

200

201 **Figure 1: Cognitive performance before and after general anaesthesia.**

202 **a**, Study design: Neuropsychological (NP) tests and working memory (WM) task with  
 203 electroencephalography (EEG) were obtained before (Session 1) and after (Session 2) prostatectomy  
 204 under general anaesthesia.

205 **b**, NP test scores (n = 26). Only California Verbal Learning Task total recall (pink) showed significant  
 206 changes compared to zero (p-value corrected for multiple comparisons = 0.015; \* p < 0.05), revealing  
 207 that patients could remember less words. TMT-B (grey): Trail Making Test B, GPT (orange): Grooved  
 208 Pegboard Test, DS (purple): Digit Span. Red cross: mean. Green box: standard error of the mean  
 209 (SEM).

210 **c**, Task design WM: Sample presentation (blue) is followed by 3 second delay (orange), then probe  
 211 presentation (grey): in memory either exactly the same (match) or an altered version (non-match), in  
 212 control, either a horizontally or vertically oriented ellipse (grey).

213 **d**, Accuracy of memory and control (left) and match and mis-match memory trials (right; n = 26).  
 214 Discrimination of matches was more accurate after anaesthesia while less mis-matches were identified  
 215 (t-test, p-values uncorrected). Grey dotted lines: single subjects. Red lines: mean +/- SEM.

216

## 217 *Cognitive performance before and after general anaesthesia*

218 Patients remembered less words in the post-anaesthesia NP session (CVLT  
219 total recall/zero  $t_{25} = -3.25$ , Bonferroni-corrected  $p = 0.015$   $d = -0.902$ ; **Fig. 1b, Table**  
220 **S2**). In addition, they tended towards being slower in learning new words (CVLT  
221 learning slope/zero  $t_{25} = -1.97$ , Bonferroni-corrected  $p = 0.3$ ,  $d = -0.546$ ). The other  
222 NP tests did not differ between sessions (**Table S2, Fig. 1b**). Thus, subsequent  
223 analysis focused on CVLT metrics.

224

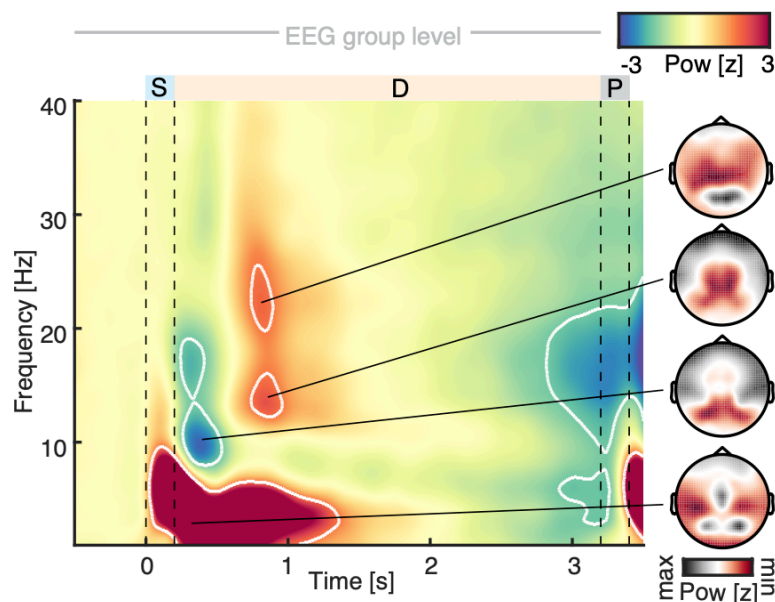

225

### 226 **Figure 2: Grand average spectral power across all conditions and sessions.**

227 Left – temporal evolution. Cold colours - decrease, warm colours - increase compared to baseline (-0.5  
228 to 0 s). White Contour marks a z-score of 1.65 (equivalent to  $p < 0.05$ , one-tailed). Note the low  
229 frequency power increase (0-7 Hz) starts from stimulus presentation, in line with an ERP effect. In the  
230 delay period (0.3 to 3.1 s), an alpha/beta (7-19 Hz) power decrease as well as a low beta (14-18 Hz)  
231 and high beta (18-25 Hz) power increase emerge. Right – spatial extent of power changes (black –  
232 maximal, red – minimal z-scored power). Note, the localization of alpha/beta effects to visual cortex and  
233 of beta effect to parietal and motor cortices.

234

235 Between the two memory sessions of the WM task, overall accuracy was  
236 comparable (values see **Table 2** and **Fig. 1**; *repeated-measures ANOVA*: condition  
237  $F_{1,25} = 4.574$ ,  $p = 0.042$ ; session  $F_{1,25} = 0.012$ ,  $p = 0.912$ ; condition\*session  $F_{1,25} =$

238 1.404,  $p = 0.247$ ; *dprime t-test*:  $p = 0.245$ ). When analysing match and mis-match trials  
239 separately, there was an overall tendency for patients to become more accurate in  
240 detecting matches and less so in recognizing mis-matches (**Fig. 1**; *repeated-measures*  
241 *ANOVA*: match  $F_{1,25} = 3.412$ ,  $p = 0.077$ ; session  $F_{1,25} = 0.497$ ,  $p = 0.487$ ;  
242 match\*session  $F_{1,25} = 3.866$ ,  $p = 0.060$ ), in line with a response bias shift towards  
243 matches (**Table 2**; *t-test*:  $p = 0.049$ ). For reaction times, there were no overall, match  
244 or mis-match differences (**Table 2**, **Fig. S2**), therefore, we focused on accuracy  
245 differences between match and mis-match trials for subsequent analysis of any  
246 association between WM behaviour and electrophysiology.

247 Interestingly, there was no relationship between accuracy and NP assessment  
248 scores ( $\Delta = Se2 - Se1$ ;  $\Delta AC_{match}/z\text{-score total recall } r = 0.17$ ,  $p = 0.417$ ;  $\Delta$   
249  $AC_{match}/z\text{-score learning slope } r = 0.26$ ,  $p = 0.191$ ;  $\Delta AC_{mis\text{-}match}/z\text{-score total}$   
250  $recall r = 0.05$ ,  $p = 0.817$ ;  $\Delta AC_{mis\text{-}match}/z\text{-score learning slope } r = -0.07$ ,  $p = 0.724$ ;  
251 **Fig. S2a**) indicating that they reflect different cognitive processes.

252

### 253 *Oscillatory activity in the beta frequency band is associated with a visual accuracy*

254 Grand average power (**Fig. 2**) across all subjects, conditions and sessions  
255 revealed an early increase of delta/theta power (0.5 – 7 Hz), followed by a decrease in  
256 the alpha/beta range (8 – 19 Hz) and an increment in the low and high beta frequency  
257 band (12 – 16, 20 – 26 Hz) compared to baseline (-0.5 – 0 s), in line with recent work<sup>20</sup>.  
258 Here, we focused on these frequency bands and the delay period (0.3 – 3.1 s) where  
259 stimulus related activity was absent.

260 Between conditions, we found that spectral power was significantly higher in the  
261 control conditions (*cluster-based permutation t-test*:  $t_{sum} = 6.53 \cdot 10^4$ ,  $p < 0.001$ ) in the  
262 theta/alpha (7 – 9 Hz) and low beta band (14 – 18 Hz), revealing a sustained

263 suppression of theta/alpha power in the memory conditions (**Fig. 3a**, single sessions  
 264 see **Figures S4**).

265

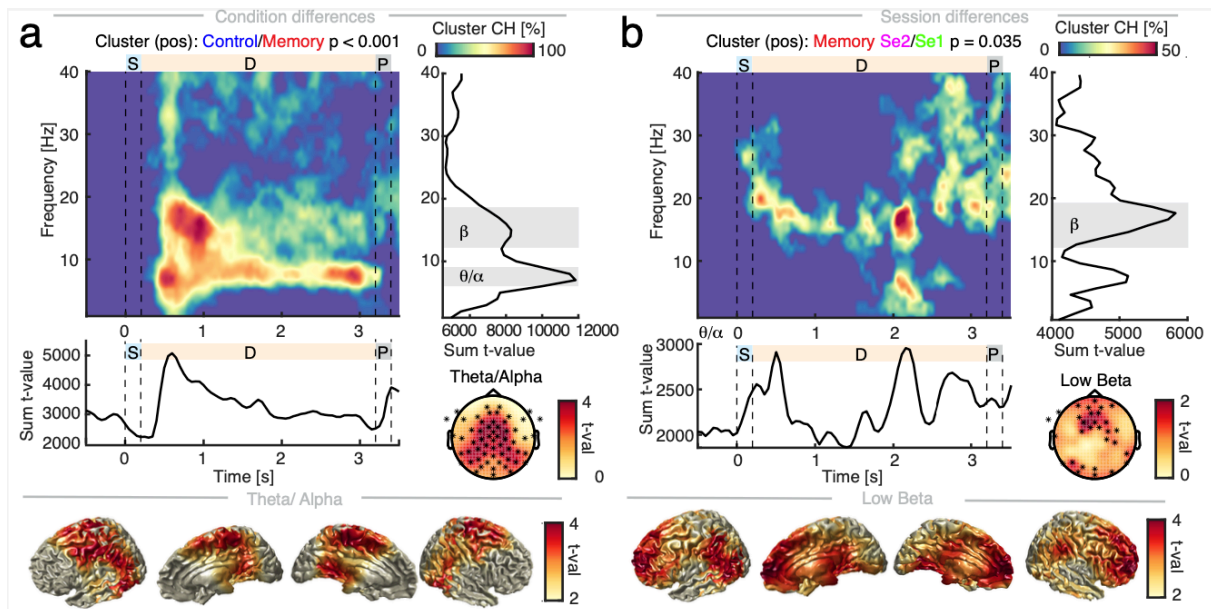

266

267 **Figure 3: Spectral power changes across conditions and sessions.**

268 Sequence of WM task: blue/S – sample, orange/D – delay, grey/P – probe. **a**, Left upper – Condition  
 269 power differences between control and memory averaged across sessions (baseline-corrected;  $n = 26$ ).  
 270 Colour: percent of channels in cluster from blue – 0 to red – 100%. Right upper – Sum of t-values per  
 271 frequency. Note the peaks in theta/alpha (7 – 9 Hz) and low beta (14 – 18 Hz). Left middle – Sum of t-  
 272 values per time. Note the increased activity in theta/alpha in the control condition compared to the  
 273 memory one, revealing a sustained suppression in memory trials. Right middle – spatial extent of  
 274 theta/alpha power differences on scalp. Lower panel – source-interpolated on a template brain in MNI  
 275 space. Low beta power exhibited a similar spatial spread and was therefore omitted here. Colour-coded:  
 276 yellow – no difference to red – strong difference.

277 **b**, Left upper – Memory session power differences (baseline-corrected;  $n = 26$ ). Colour-coded: percent  
 278 of channels in cluster from blue – 0 to red – 50%. Right upper – Sum of t-values per frequency. Note  
 279 the peak in low beta (14 – 18 Hz). Left middle – Sum of t-values per time. Note the pulsing of beta during  
 280 delay. Right middle – spatial extent of low beta power differences on scalp. Lower panel – source-  
 281 interpolated on template brain in MNI space. Colour-coded: yellow – no difference to red – strong  
 282 difference.

283

284 Between memory sessions (**Fig. 3b**), power significantly increased post-  
 285 anaesthesia (*cluster-based permutation t-test*:  $t_{\text{sum}} = 2.16 \cdot 10^4$ ,  $p = 0.035$ ) in the low  
 286 beta band (14 – 18 Hz). There were no differences between control sessions (*cluster-  
 287 based permutation t-test*:  $p = 0.401$ ). Importantly, this effect could not be explained by  
 288 ERP differences (**Fig. S5**). The power increase in the low beta frequency band as well  
 289 as in the theta/alpha and high beta/low gamma ranges were significantly correlated



290 with a better accuracy in detecting match trials (**Fig. 4a**; *cluster-based permutation*  
 291 *correlation*:  $t_{\text{sum}} = 5.89 \cdot 10^4$ ,  $p < 0.001$ ) but with a worse performance in recognizing  
 292 mis-matches (**Fig. 4b**; *cluster-based permutation correlation*:  $t_{\text{sum}} = -3.85 \cdot 10^4$ ,  $p =$   
 293  $0.022$ ). Note, that power changes in these frequency bands were not correlated with  
 294 the NP scores (**Fig. S3c,e**, *cluster-based permutation correlation with power session*  
 295 *difference*: total recall  $p = 0.439$ , learning slope  $p = 0.358$ ).  
 296

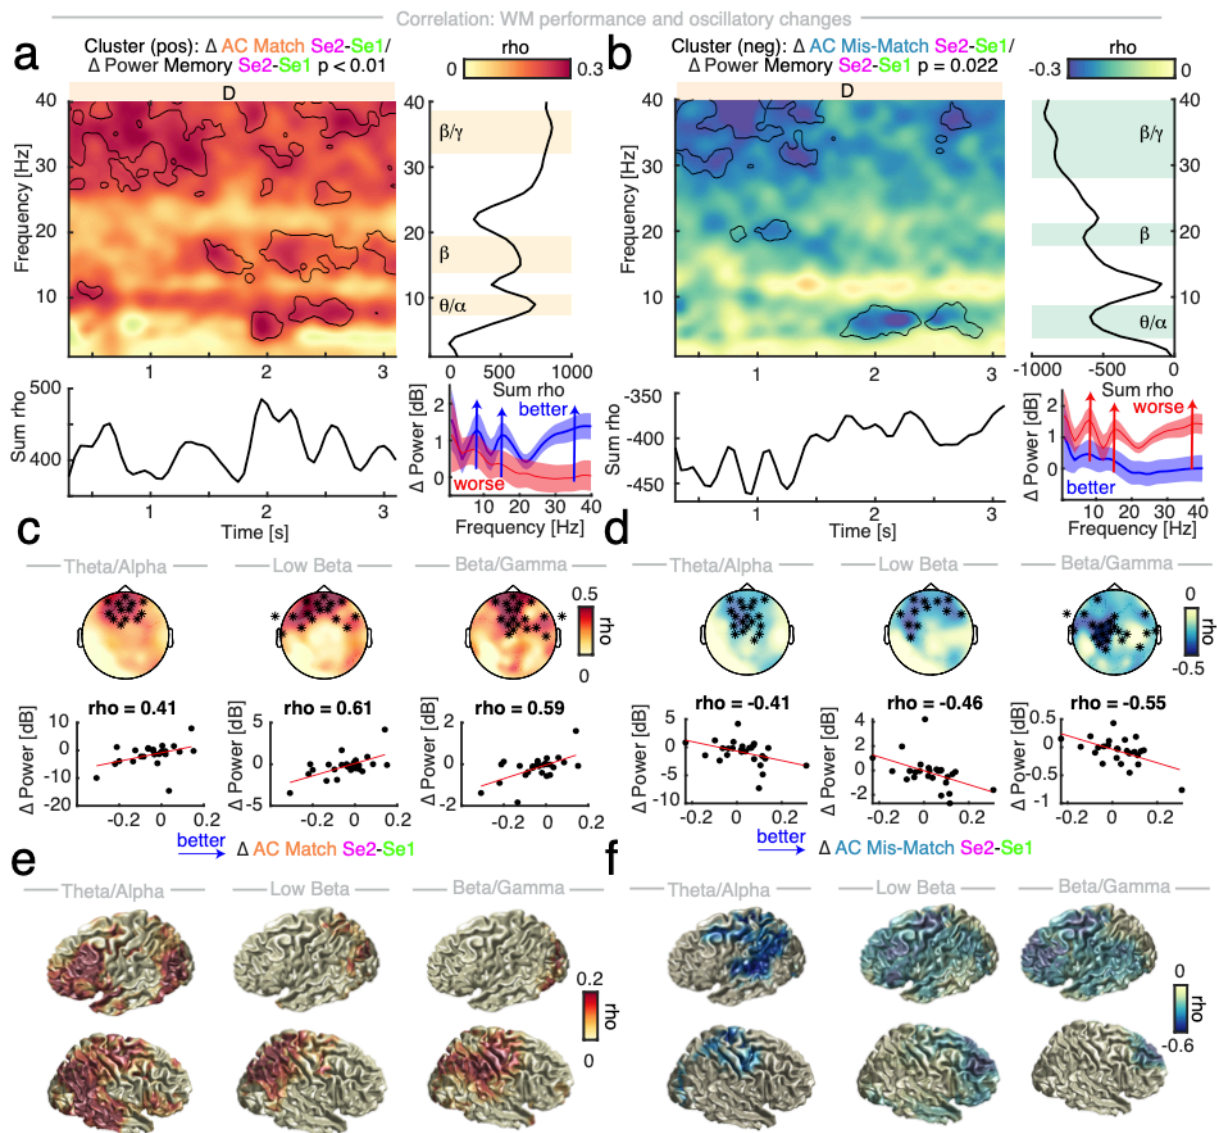

297  
 298

299 **Figure 4: Behaviourally relevant oscillatory spectral changes.**  
 300 Association between memory session spectral power ( $\Delta$  Se2 – Se1) and accuracy (AC) differences in  
 301 the delay (0.3 to 3.1 s,  $n = 26$ ). **a**, Match: Left upper – cluster permutation correlation. Black contour –  
 302  $\rho > 0.2$ . Orange/D – delay. Right upper – Sum of t-values per frequency. Note the peaks in theta/alpha  
 303 and low beta frequency range as well as a broadband effect with a peak in the high beta/low gamma  
 304 range. Lower left – Sum of t-values over time. Lower right – Median AC Match split of power difference  
 305 ( $\Delta$  Se2 – Se1; baseline-corrected; mean with SEM). Red – worse, blue – better performance. **b**, Mis-

306 Match: Left upper – cluster permutation correlation. Black contour –  $\rho < -0.2$ . Orange/D – delay. Right  
307 upper – Sum of t-values per frequency. Note the negative peaks in similar frequency ranges. Lower left  
308 – Sum of t-values over time. Lower right – Median split AC Mis-match of power difference ( $\Delta Se_2 - Se_1$ ;  
309 baseline-corrected; mean with SEM). Red – worse, blue – better performance. Correlation of AC and  
310 power in the theta/alpha (7 – 9 Hz), low beta (14 – 18 Hz) and high beta/low gamma range (34 – 38 Hz).  
311 **c**, AC Match: Upper row – Spatial extent, Lower row – correlation  $\rho$ . **d**, AC Mis-match: Upper row –  
312 Spatial extent, Lower row – correlation  $\rho$ . **e**, AC Match: Rho-values source-interpolated on a standard  
313 template brain in MNI space (threshold  $p < 0.05$ ). **f**, AC Mis-match: Rho-values in MNI space.  
314

315 *Increased aperiodic activity is associated with better performance in*  
316 *neuropsychological assessment*

317 In line with an increase of aperiodic activity, the PSD became flatter (i.e. the  
318 slope decreased) in the post-anaesthesia memory session (**Table 2, Fig. 5a**; *cluster-*  
319 *based permutation t-test*:  $t_{sum} = 9.60$ ,  $p = 0.073$ ).

320 A flattening of the PSD was associated with a better performance in the NP  
321 CVLT total recall (**Fig. 5b-c**; *cluster-based permutation correlation*:  $\Delta$  slope/z-score  
322 total recall  $r = 0.66$ ,  $p = 0.029$ ) and learning slope (*cluster-based permutation*  
323 *correlation*:  $\Delta$  slope/z-score learning slope  $r = 0.66$ ,  $p = 0.015$ ) but not with the WM  
324 performance (**Fig. S3f**; *post-hoc correlations*:  $\Delta$  slope of cluster channels/  $\Delta$  AC match  
325  $r = 0.19$ ,  $p = 0.365$ ;  $\Delta$  slope of cluster channels/ $\Delta$  AC mis-match  $r = 0.03$ ,  $p = 0.876$ ).  
326 Beta power increases were not associated with slope decreases (14 – 18 Hz; *post-hoc*  
327 *correlation*:  $r = 0.15$ ,  $p = 0.449$ ; **Fig. S3d**).

328

329

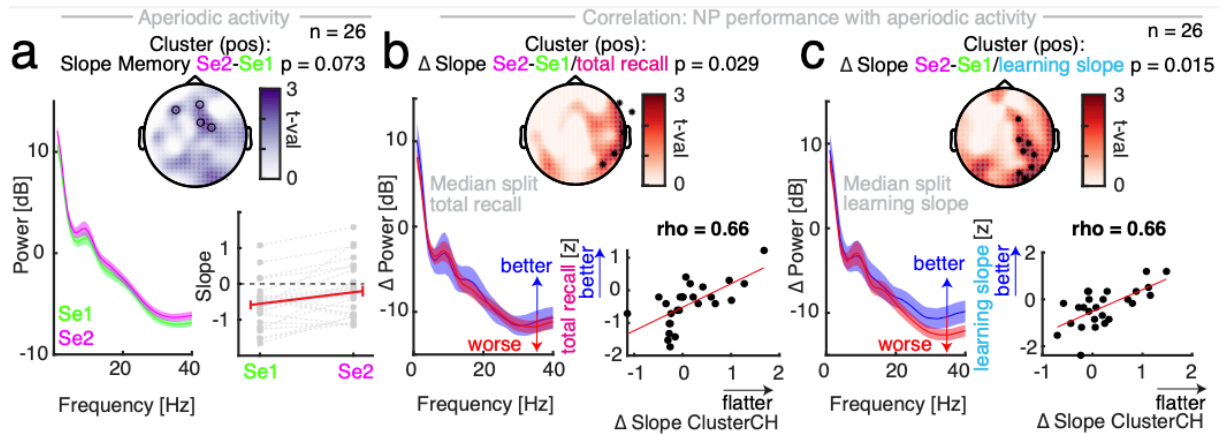

330

331

332

**Figure 5: Aperiodic activity in pre- and post-anaesthesia memory sessions.**

333

**a**, Lower left – Spectral power. Middle – Spectral slope session difference borders on significance (*cluster permutation t-test*  $t_{25} = 9.6$ ,  $p = 0.073$ ) with a focus on frontal channels (black circles). Lower right – Spectral slopes (*post-hoc t-test*:  $t_{25} = 1.97$ ,  $p = 0.060$ ,  $d = 0.31$ ). Grey dotted lines – single subjects. Red line – mean  $\pm$  SEM.

336

Association between session differences ( $\Delta$  Se2 – Se1) of spectral slope and neuropsychological test scores (negative z-scores indicate worse performance;  $n = 26$ ). **b**, Lower left – Median split of spectral power difference by total recall z-scores. Blue – better, red – worse performance. Middle - Spatial extent of and right lower – correlation between  $\Delta$  slope with z-score total recall in cluster channels. **c**, Lower left – Median split of spectral power difference by learning slope z-scores. Blue – better, red – worse performance. Middle - Spatial extent of and right lower – correlation between  $\Delta$  slope and z-score of learning slope in cluster channels.

344

345



## 346 **Discussion**

347       The current study examined the impact of surgery and general anaesthesia on  
348 postoperative cognitive performance and electrophysiology using neuropsychological  
349 (NP) assessment and a visual working memory (WM) task with concomitant scalp  
350 EEG. We observed a striking double dissociation between cognitive performance and  
351 EEG signatures. Behavioural results revealed that patients' working memory  
352 performance in general did not change despite surgery under general anaesthesia.<sup>27-</sup>  
353 <sup>29</sup> However, performance differences between match and mis-match trials emerged in  
354 the postoperative session. Performance increases in match trials in the WM task were  
355 associated with an enhancement of low and high beta oscillations in the postoperative  
356 session. Additionally, better cognitive function in NP assessment was accompanied by  
357 a rise of aperiodic, non-oscillatory brain activity. These findings reveal that rhythmic  
358 and arrhythmic neural activity tracks distinct facets of peri-anaesthesia cognition.

359

### 360 ***Oscillatory signatures of working memory***

361       Neural oscillations in various frequency bands have been implicated in WM.<sup>13</sup>  
362 While theta (3-8 Hz) oscillations have been related to successful recognition<sup>30</sup> and are  
363 thought to temporally structure WM items<sup>13</sup>, alpha oscillations (8-12 Hz) are often  
364 associated with inhibition<sup>31, 32</sup> and assumed to suppress task-irrelevant activity.<sup>13</sup> Beta  
365 activity (13-30 Hz) reflects at least two functionally and spatially distinct components,  
366 the sensorimotor beta oscillation that mediates motor control and frontal beta activity,  
367 which is related to top-down cognitive processing.<sup>27, 28</sup> Increased beta and gamma  
368 activity (~40 Hz)<sup>10</sup> have been linked to the active maintenance of information in WM.<sup>13</sup>  
369 <sup>20, 28</sup> Here, we found a memory-related suppression of theta/alpha and low beta activity

370 (7-18 Hz; **Fig. 3a**) over fronto-parietal cortices in line with a release from inhibition in  
371 task-relevant areas.<sup>31, 33</sup>

372 Between pre- and post-anaesthesia memory sessions, low beta (14 – 18 Hz)  
373 oscillations increased, occurring in bursts over frontal cortex during the entire delay  
374 period (**Fig. 3b**) potentially signalling top-down control.<sup>27–29</sup> Importantly, this beta  
375 enhancement was associated with differential processing of match and non-match  
376 trials in the WM task (**Fig. 4**). Increases in performance in match trials from pre- to  
377 postoperative assessments were associated with increases in theta (7-9 Hz), low beta  
378 (14-18 Hz), and beta/gamma (34-38 Hz) oscillatory activity. Whereas decreases in  
379 performance in non-match trials from pre- to postoperative assessments were  
380 associated with increases in theta (7-9 Hz) and beta/gamma (34-38 Hz) oscillatory  
381 activity (**Fig.4**). Beta and gamma bursts during WM maintenance were suggested to  
382 be related to readout and control mechanism in WM tasks<sup>34</sup> and also with inhibition of  
383 competing visual memories.<sup>35</sup> Thus, our findings are well in line with theories proposing  
384 that enhanced oscillatory synchrony enables the efficient network communication  
385 which is the fundament of optimal cognitive processing.<sup>36</sup>

386

### 387 ***The importance of aperiodic activity for cognitive function***

388 While some recent evidence suggests that a shift of oscillatory peak frequency  
389 of the posterior alpha frequency activity can outlast anaesthesia and might relate to  
390 cognitive performance<sup>37</sup>, the importance of aperiodic activity for cognitive function in a  
391 perioperative setting has not yet been investigated. Recently, several lines of inquiry  
392 highlighted that aperiodic activity tracks task-related neural activity in a variety of  
393 cognitive domains such as attention<sup>18</sup>, motor execution<sup>38</sup> and working memory<sup>14, 39</sup> and  
394 is related to better task performance. In the present study, we observed a similar

395 pattern, namely that enhanced aperiodic activity (i.e. flattening of the PSD/ decrease  
396 of spectral slope) after anaesthesia was associated with a better performance in the  
397 neuropsychological assessment (**Fig. 5**). If aperiodic activity was not enhanced or even  
398 reduced after anaesthesia, patients performed worse (**Fig. 5**). Our findings  
399 demonstrate that an increase of aperiodic activity tracks a selective activation of task-  
400 relevant cortices resulting in better cognitive performance.

401

402 ***Anaesthetic-induced inhibition overhang as a potential contributor to***  
403 ***postoperative neurocognitive impairment***

404 Experimental evidence and computational modelling have linked aperiodic  
405 activity to the excitation to inhibition balance of the underlying neuronal population,  
406 where an increase of inhibition (e.g. by GABAergic drugs like propofol) results in a  
407 steepening of the PSD (i.e. an increase of spectral slope).<sup>15-17</sup> Increased cortical  
408 (excitatory) activity, on the other hand, led to a flattening of the PSD (i.e. a decrease  
409 in slope) that was associated with improved task performance.<sup>18, 19</sup> Computational  
410 modelling established that aperiodic activity indexes the underlying balance between  
411 excitatory and inhibitory neuronal activity on the population level<sup>17</sup>. Anaesthetics like  
412 propofol and sevoflurane increase cortical inhibition via GABA receptors. Recent  
413 electrophysiological studies confirmed that increased inhibition reduces aperiodic  
414 activity as indexed by a steepening of the PSD, i.e. an increase of spectral slope.<sup>15-18</sup>

415 To date it remains unclear how fast this inhibition dissipates after drug  
416 administration is discontinued. While the healthy young brain is resilient to  
417 electrophysiological disturbances by anaesthesia<sup>40</sup>, elderly patients are more sensitive  
418 to anaesthetics and therefore more likely to enter burst suppression<sup>4</sup> - a pattern of  
419 brain activity induced by a maximum of inhibition where bursts of activity are followed

420 by periods of neuronal silence.<sup>41</sup> Time spent in that (too) deep plane of anaesthesia is  
421 an independent risk factor for developing POD.<sup>2, 42</sup> Not only age but also individual  
422 brain vulnerability plays a role in susceptibility to adverse cognitive outcomes after  
423 anaesthesia: Patients that reacted with intraoperative EEG suppression at lower doses  
424 of anaesthetics were more likely to develop POD.<sup>43, 44</sup> In addition, a recent study that  
425 examined EEG parameters before, during and after anaesthesia found that a lower  
426 preoperative spectral edge frequency and gamma power were independently related  
427 to the development of POD.<sup>5</sup> Note that these findings could also be explained by a  
428 steeper slope of the preoperative PSD (i.e. more inhibition) in the POD group  
429 compared to the patients that did not develop POD. In the current study, patients that  
430 showed an increase of aperiodic activity (less inhibition) after anaesthesia, performed  
431 better in postoperative neuropsychological assessment whereas patients that  
432 exhibited a decrease (more inhibition) performed worse (**Fig. 5**).

433 Taken together, these findings suggest that anaesthesia-induced inhibition  
434 potentially outlasts drug administration in elderly patients and that this inhibition  
435 overhang impedes optimal postoperative cognition. Pre-existing alterations of neuronal  
436 balance between excitation and inhibition (such as a premedication with e.g.  
437 benzodiazepines) could be a predisposing factor for developing postoperative  
438 cognitive decline. Thus, aperiodic brain activity might provide a valuable marker to  
439 track perioperative cognition - before, during and after anaesthesia.

440

441

## 442 ***Strengths and limitations***

443           Key advantages of the current study are: 1) It focused on electrophysiological  
444 changes in the early postoperative period. 2) Both NP assessments as well as a WM  
445 task were obtained. 3) It had a substantial scalp EEG coverage (62 channels instead  
446 of 10 or 20 sensors). 4) The WM task featured a control condition to evaluate memory-  
447 specific changes. 5) It examined an elderly cohort vulnerable to perioperative cognitive  
448 changes. The study had the following limitations: 1) It was conducted at a prostate  
449 cancer centre; thus, only men were included limiting generalisability of results. 2) There  
450 was no matched control group, restricting our ability to differentiate session- from  
451 purely anaesthesia-related changes. 3) Fifteen patients did not complete the second  
452 session, potentially patients that suffered from more postoperative complications. High  
453 drop-out rates are frequently reported in studies focusing on perioperative cognitive  
454 disorders (Ref) and pose a relevant source of selection bias. To address this issue, we  
455 compared demographic and clinical characteristics between patients, who completed  
456 all pre- and postoperative assessments and those who did not without observing  
457 relevant differences.

458

## 459 **Conclusion**

460           Here, we present empirical evidence that oscillatory and aperiodic dynamics  
461 track different aspects of perioperative cognition. Specifically, aperiodic activity as an  
462 index of population activity and anaesthesia-induced inhibition overhang might prove  
463 to be a valuable biomarker in tracking cognitive function in the perioperative setting.

464

465

466 **Acknowledgments**

467 The authors would like to thank Randolph Helfrich, Hertie-Institute for Clinical Brain  
468 Research, Tübingen, for his advice regarding data analysis as well as his valuable  
469 input on the manuscript.

470

471 **Declaration of interests**

472 The authors declare that they have no conflict of interest.

473

474 **Funding**

475 This work was supported by a grant of the German Research Foundation (DFG LE  
476 3863/2-1) to JDL.

477

478 **Details of author's contribution**

479 All authors declare that they took part in the revision of this manuscript, that they  
480 approved of the final version and they agree to be accountable for all aspects of the  
481 work. Furthermore, the authors contributed in the following areas: JDL: Data analysis,  
482 data interpretation, writing of first draft of manuscript; UH: Patient recruitment, data  
483 collection; JD, AKE, CZ: Study design; TS: Study design, data collection, data analysis  
484 and interpretation; MF: Study design, patient recruitment, data collection, data analysis  
485 and interpretation.

486

487 **Data and custom code availability**

488 Data will be made available upon reasonable request to Marlene Fischer  
489 ([mar.fischer@uke.de](mailto:mar.fischer@uke.de)). Custom code will be shared upon reasonable request to the  
490 corresponding author.

491 **References**

- 492 1. Guenther U, Radtke FM. Delirium in the postanaesthesia period. *Curr Opin*  
493 *Anaesthesiol* 2011; **24**: 670–5
- 494 2. Radtke FM, Franck M, Lendner J, Krüger S, Wernecke KD, Spies CD.  
495 Monitoring depth of anaesthesia in a randomized trial decreases the rate of  
496 postoperative delirium but not postoperative cognitive dysfunction. *Br J Anaesth*  
497 2013; **110 Suppl 1**: i98-105
- 498 3. Newman S, Stygall J, Hirani S, Shaefi S, Maze M. Postoperative cognitive  
499 dysfunction after noncardiac surgery: a systematic review. *Anesthesiology* 2007; **106**:  
500 572–90
- 501 4. Brown EN, Purdon PL. The aging brain and anesthesia. *Curr Opin*  
502 *Anaesthesiol* 2013; **26**: 414–9
- 503 5. Koch S, Windmann V, Chakravarty S, et al. Perioperative  
504 Electroencephalogram Spectral Dynamics Related to Postoperative Delirium in Older  
505 Patients. *Anesth Analg* 2021; **133**: 1598–607
- 506 6. Steinmetz J, Christensen KB, Lund T, Lohse N, Rasmussen LS, ISPOCD  
507 Group. Long-term consequences of postoperative cognitive dysfunction.  
508 *Anesthesiology* 2009; **110**: 548–55
- 509 7. Phillips-Bute B, Mathew JP, Blumenthal JA, et al. Association of  
510 neurocognitive function and quality of life 1 year after coronary artery bypass graft  
511 (CABG) surgery. *Psychosom Med* 2006; **68**: 369–75
- 512 8. Messerotti Benvenuti S, Zanatta P, Longo C, Mazzarolo AP, Palomba D.  
513 Preoperative cerebral hypoperfusion in the left, not in the right, hemisphere is  
514 associated with cognitive decline after cardiac surgery. *Psychosom Med* 2012; **74**:  
515 73–80
- 516 9. Tanino M, Kobayashi M, Sasaki T, et al. Isoflurane Induces Transient  
517 Impairment of Retention of Spatial Working Memory in Rats. *Acta Med Okayama*  
518 2016; **70**: 455–60
- 519 10. Tallon-Baudry C, Bertrand O, Peronnet F, Pernier J. Induced  $\gamma$ -Band Activity  
520 during the Delay of a Visual Short-Term Memory Task in Humans. *J Neurosci*  
521 Society for Neuroscience; 1998; **18**: 4244–54
- 522 11. Sarnthein J, Petsche H, Rappelsberger P, Shaw GL, von Stein A.  
523 Synchronization between prefrontal and posterior association cortex during human  
524 working memory. *Proc Natl Acad Sci U S A* 1998; **95**: 7092–6
- 525 12. Fell J, Axmacher N. The role of phase synchronization in memory processes.  
526 *Nat Rev Neurosci* 2011; **12**: 105–18
- 527 13. Roux F, Uhlhaas PJ. Working memory and neural oscillations: alpha–gamma  
528 versus theta–gamma codes for distinct WM information? *Trends in Cognitive*  
529 *Sciences* 2014; **18**: 16–25
- 530 14. Donoghue T, Haller M, Peterson EJ, et al. Parameterizing neural power  
531 spectra into periodic and aperiodic components. *Nat Neurosci* 2020; **23**: 1655–65
- 532 15. Lendner JD, Helfrich RF, Mander BA, et al. An electrophysiological marker of  
533 arousal level in humans. Haegens S, editor. *eLife* eLife Sciences Publications, Ltd;  
534 2020; **9**: e55092
- 535 16. Colombo MA, Napolitani M, Boly M, et al. The spectral exponent of the resting  
536 EEG indexes the presence of consciousness during unresponsiveness induced by  
537 propofol, xenon, and ketamine. *Neuroimage* 2019; **189**: 631–44
- 538 17. Gao R. Interpreting the electrophysiological power spectrum. *J Neurophysiol*



- 539 2016; **115**: 628–30
- 540 18. Waschke L, Donoghue T, Fiedler L, et al. Modality-specific tracking of  
541 attention and sensory statistics in the human electrophysiological spectral exponent.  
542 *Elife* 2021; **10**: e70068
- 543 19. Podvalny E, Noy N, Harel M, et al. A unifying principle underlying the  
544 extracellular field potential spectral responses in the human cortex. *Journal of*  
545 *Neurophysiology* American Physiological Society; 2015; **114**: 505–19
- 546 20. Daume J, Gruber T, Engel AK, Fries U. Phase-Amplitude Coupling and  
547 Long-Range Phase Synchronization Reveal Frontotemporal Interactions during  
548 Visual Working Memory. *J Neurosci* 2017; **37**: 313–22
- 549 21. Carbone E, Vianello E, Carretti B, Borella E. Working Memory Training for  
550 Older Adults After Major Surgery: Benefits to Cognitive and Emotional Functioning.  
551 *Am J Geriatr Psychiatry* 2019; **27**: 1219–27
- 552 22. Price CC, Garvan C, Hizek LP, Lopez MG, Billings FT. Delayed Recall and  
553 Working Memory MMSE Domains Predict Delirium following Cardiac Surgery. *J*  
554 *Alzheimers Dis* 2017; **59**: 1027–35
- 555 23. Zhang X, Jiang X, Huang L, et al. Central cholinergic system mediates  
556 working memory deficit induced by anesthesia/surgery in adult mice. *Brain Behav*  
557 2018; **8**: e00957
- 558 24. Snodgrass JG, Vanderwart M. A standardized set of 260 pictures: norms for  
559 name agreement, image agreement, familiarity, and visual complexity. *J Exp Psychol*  
560 *Hum Learn* 1980; **6**: 174–215
- 561 25. Oostenveld R, Fries P, Maris E, Schoffelen J-M. FieldTrip: Open source  
562 software for advanced analysis of MEG, EEG, and invasive electrophysiological data.  
563 *Comput Intell Neurosci* 2011; **2011**: 156869
- 564 26. Hipp JF, Siegel M. Dissociating neuronal gamma-band activity from cranial  
565 and ocular muscle activity in EEG. *Front Hum Neurosci* 2013; **7**: 338
- 566 27. Engel AK, Fries P. Beta-band oscillations—signalling the status quo? *Current*  
567 *Opinion in Neurobiology* 2010; **20**: 156–65
- 568 28. Miller EK, Lundqvist M, Bastos AM. Working Memory 2.0. *Neuron* 2018; **100**:  
569 463–75
- 570 29. Spitzer B, Haegens S. Beyond the Status Quo: A Role for Beta Oscillations in  
571 Endogenous Content (Re)Activation. *eNeuro* [Internet] Society for Neuroscience;  
572 2017 [cited 2022 Feb 23]; **4** Available from:  
573 <https://www.eneuro.org/content/4/4/ENEURO.0170-17.2017>
- 574 30. Staudigl T, Hanslmayr S. Theta oscillations at encoding mediate the context-  
575 dependent nature of human episodic memory. *Curr Biol* 2013; **23**: 1101–6
- 576 31. Peterson EJ, Voytek B. Alpha oscillations control cortical gain by modulating  
577 excitatory-inhibitory background activity [Internet]. 2017 Sep p. 185074 Available  
578 from: <https://www.biorxiv.org/content/10.1101/185074v2>
- 579 32. Jensen O, Bonnefond M, Marshall TR, Tiesinga P. Oscillatory mechanisms of  
580 feedforward and feedback visual processing. *Trends in Neurosciences* 2015; **38**:  
581 192–4
- 582 33. Jensen O, Mazaheri A. Shaping Functional Architecture by Oscillatory Alpha  
583 Activity: Gating by Inhibition. *Front Hum Neurosci* 2010; **4**: 186
- 584 34. Lundqvist M, Rose J, Herman P, Brincat SL, Buschman TJ, Miller EK. Gamma  
585 and Beta Bursts Underlie Working Memory. *Neuron* 2016; **90**: 152–64
- 586 35. Park H-D, Min B-K, Lee K-M. EEG oscillations reflect visual short-term  
587 memory processes for the change detection in human faces. *Neuroimage* 2010; **53**:



- 588 629–37
- 589 36. Fries P. Rhythms For Cognition: Communication Through Coherence. *Neuron*  
590 2015; **88**: 220–35
- 591 37. Labonte AK, Kafashan M, Huels ER, et al. The posterior dominant rhythm: an  
592 electroencephalographic biomarker for cognitive recovery after general anaesthesia.  
593 *British Journal of Anaesthesia* [Internet] Elsevier; 2022 [cited 2022 Feb 22]; **0**  
594 Available from: [https://www.bjanaesthesia.org.uk/article/S0007-0912\(22\)00028-](https://www.bjanaesthesia.org.uk/article/S0007-0912(22)00028-9/fulltext)  
595 [9/fulltext](https://www.bjanaesthesia.org.uk/article/S0007-0912(22)00028-9/fulltext)
- 596 38. Miller KJ, Zanos S, Fetz EE, den Nijs M, Ojemann JG. Decoupling the cortical  
597 power spectrum reveals real-time representation of individual finger movements in  
598 humans. *J Neurosci* 2009; **29**: 3132–7
- 599 39. Voytek B, Kramer MA, Case J, et al. Age-Related Changes in 1/f Neural  
600 Electrophysiological Noise. *J Neurosci* 2015; **35**: 13257–65
- 601 40. Mashour GA, Palanca BJ, Basner M, et al. Recovery of consciousness and  
602 cognition after general anesthesia in humans. O’Connell RG, Ivry RB, O’Connell RG,  
603 Tristan B, editors. *eLife* eLife Sciences Publications, Ltd; 2021; **10**: e59525
- 604 41. Brown EN, Lydic R, Schiff ND. General anesthesia, sleep, and coma. *N Engl J*  
605 *Med* 2010; **363**: 2638–50
- 606 42. Evered LA, Chan MTV, Han R, et al. Anaesthetic depth and delirium after  
607 major surgery: a randomised clinical trial. *Br J Anaesth* 2021; **127**: 704–12
- 608 43. Fritz BA, Maybrier HR, Avidan MS. Intraoperative electroencephalogram  
609 suppression at lower volatile anaesthetic concentrations predicts postoperative  
610 delirium occurring in the intensive care unit. *British Journal of Anaesthesia* Elsevier;  
611 2018; **121**: 241–8
- 612 44. Pedemonte JC, Plummer GS, Chamadia S, et al. Electroencephalogram  
613 Burst-suppression during Cardiopulmonary Bypass in Elderly Patients Mediates  
614 Postoperative Delirium. *Anesthesiology* 2020; **133**: 280–92
- 615

616 **Tables**

617 **Table 1**

|                                           | <b>N = 26</b> |
|-------------------------------------------|---------------|
| <b>Age (y)</b>                            | 66 ± 3        |
| <b>Body Mass Index (kg/m<sup>2</sup>)</b> | 27.6 ± 3.5    |
| <b>Obesity</b>                            | 6 (23.1)      |
| <b>Hypertension</b>                       | 17 (65.4)     |
| <b>Coronary artery disease</b>            | 3 (11.5)      |
| <b>Diabetes</b>                           | 1 (3.8)       |
| <b>Dyslipoproteinaemia</b>                | 8 (30.8)      |
| <b>Smoking</b>                            | 4 (15.4)      |
| <b>ASA Physical Status</b>                |               |
| <i>I</i>                                  | 2 (7.7)       |
| <i>II</i>                                 | 24 (92.3)     |
| <i>III</i>                                | 0 (0.0)       |
| <b>Midazolam</b>                          |               |
| <i>Yes</i>                                | 13 (50.0)     |
| <i>No</i>                                 | 13 (50.0)     |
| <b>Sufentanil (µg)</b>                    | 104.0 ± 23.3  |
| <b>Infused Volume (ml)</b>                | 2981 ± 640    |
| <b>Cristalloids (ml)</b>                  | 2865 ± 540    |
| <b>Colloids (ml)</b>                      |               |
| <b>Blood Loss (ml)</b>                    | 408 ± 315     |
| <b>Surgery Duration (min)</b>             | 225 ± 50      |
| <b>Anaesthesia Duration (min)</b>         | 275 ± 54      |
| <b>PACU Length of stay (min)</b>          | 178 ± 62      |

618

619

620 **Demographic and clinical characteristics of patients with complete pre- and postoperative**  
621 **assessments (N = 26).** ASA – American Society of Anesthesiology Status (1 – no comorbidities, 2 –  
622 mild systemic disease such as hypertension or diabetes). Data are given as mean ± SD or n (%).

622

623

624

625 **Table 2**

|                    | Se 1           |                |               |               | Se 2           |                |               |               |
|--------------------|----------------|----------------|---------------|---------------|----------------|----------------|---------------|---------------|
|                    | Mem            | Ctrl           | Match         | Non-Match     | Mem            | Ctrl           | Match         | Non-Match     |
| Reaction Times (s) | 1.104 ± 0.042  | 1.156 ± 0.081  | 1.131 ± 0.045 | 1.076 ± 0.044 | 1.119 ± 0.032  | 1.1484 ± 0.069 | 1.129 ± 0.037 | 1.109 ± 0.030 |
| Accuracy           | 0.778 ± 0.011  | 0.7988 ± 0.014 | 0.791 ± 0.023 | 0.766 ± 0.022 | 0.786 ± 0.012  | 0.794 ± 0.012  | 0.835 ± 0.022 | 0.737 ± 0.022 |
| Slope              | -0.272 ± 0.083 |                |               |               | -0.129 ± 0.098 |                |               |               |
| D-prime            | 1.658 ± 0.074  |                |               |               | 1.758 ± 0.103  |                |               |               |
| Bias               | -0.065 ± 0.074 |                |               |               | -0.213 ± 0.069 |                |               |               |

626  
627  
628  
629

**Working memory performance (n = 26).** All values mean ± SEM. Se – session. Mem – memory, Ctrl – control condition.

630 **Supplemental Information**

631

632 **Supplemental Material and Methods**

633 *Flow Diagram of Study*

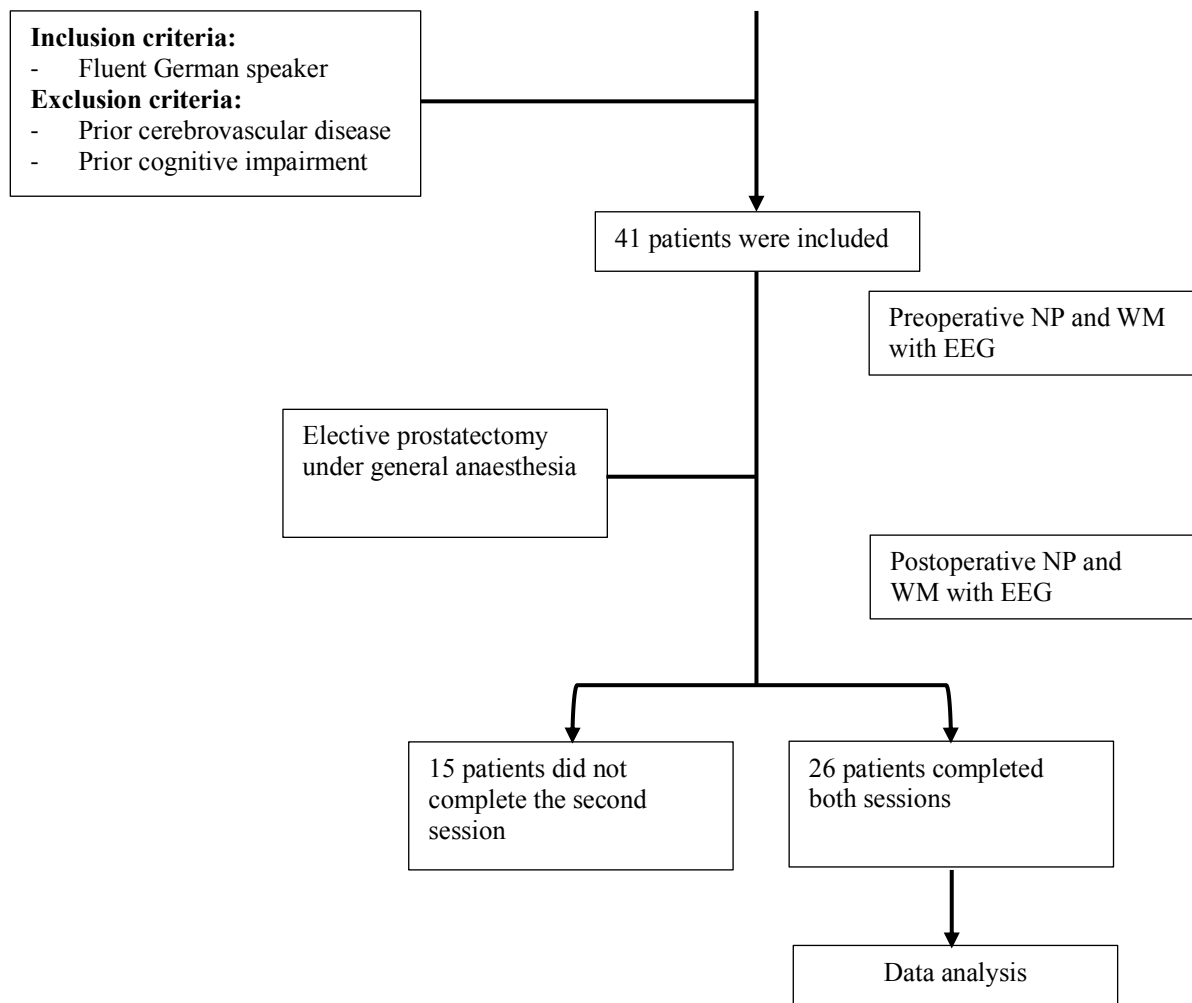

634 **Fig. S1: Flow Chart**

635

636 *Working Memory Task*

637 Each trial of both memory and control condition began with a fixation dot,  
638 followed by a 200 ms sample presentation and a 3000 ms delay period in which the  
639 fixation dot reappeared. In the memory condition, patients were then presented with

640 the probe for 200 ms (**Fig. 1**) and had to indicate whether the probe matched the  
641 sample (match) or not (non-match). Responses were registered by pressing one of two  
642 buttons using either their index or middle finger (counterbalanced). The inter-trial  
643 interval was randomly jittered in steps of 100 ms ranging from 2.5 to 3 seconds. In the  
644 control condition, an ellipse was presented for 50 ms instead of a second image. Here,  
645 patients had to report whether the ellipse was vertically or horizontally oriented.<sup>15</sup>  
646 Performance in the control condition was matched to the memory condition by  
647 changing the shape and luminance of the ellipse.<sup>15</sup> In addition, in 20% of control trials,  
648 the contrast and shape were chosen randomly to disguise the relationship to memory  
649 performance.<sup>15</sup> Before the beginning of the recording, patients had a training session  
650 where 4 trials of each condition were presented that were not part of the consecutive  
651 task.<sup>15</sup>

652

### 653 *Anaesthesiologic management*

654 General anaesthesia was induced with sufentanil (0.3–0.7 µg/kg) and propofol  
655 (2–3 mg/kg) followed by neuromuscular blockade with rocuronium (0.6 mg/kg) to  
656 facilitate endotracheal intubation. A gastric tube was inserted in all patients and  
657 prophylactic antiemetic medication was administered preoperatively (dexamethasone  
658 4 mg). During surgery, rocuronium was titrated under the guidance of neuromuscular  
659 blockade monitoring (train-of-four, TOF-Watch Organon; IntelliVue NMT module,  
660 Philips GmbH, Hamburg, Germany). Anaesthesia depth was monitored with a  
661 bispectral index monitor (BIS™, Medtronic GmbH, Meerbusch, Germany).  
662 Sevoflurane-sufentanil was used for anaesthesia maintenance to achieve an end-tidal  
663 sevoflurane concentration of 2.0 vol% (MAC 0.8–1.2). To maintain normothermia we  
664 used a forced-air warming system throughout the entire procedure. Patients who

665 underwent robot-assisted surgery received peritoneal insufflation with carbon dioxide  
666 and were positioned at a 45-degree head-down tilt. Postoperative pain management  
667 included non-opioid medication (metamizole 1000 mg/100 ml) 30 minutes before  
668 emergence and every 4–6 hours thereafter. In the post-anaesthesia care unit (PACU)  
669 piritramide 3.75–7.5 mg was administered intravenously when pain scores exceeded  
670 3. Subsequent PACU management in all patients included frequent control of wound  
671 drains and postoperative urine output, blood gas analyses, and pain management as  
672 described above.

673

#### 674 *Data cleaning – Excluded channels and trials*

675 In total, 56 channels of Session 1 (not including EOG leads; 3.47 %) and 68  
676 channels for Session 2 (4.29 %) were excluded, averaging to 2.15 channels/subject  
677 in Session 1 and 2.62 channels/subject in Session 2. Excluded channels were  
678 interpolated using their neighbours (ft\_channelrepair). Regarding trials, a total of 194  
679 trials of Session 1 (3.59 %) and 172 trials of Session 2 (3.18 %) were identified as  
680 noisy and removed, averaging to 7.46 trials/subject for Session 1 and 6.62  
681 trials/subject for Session 2.

682

#### 683 *Event-Related Potential (ERP) analysis*

684 For ERP analysis, electrophysiological data of each session was low-pass  
685 filtered below 30 Hz and split into memory and control conditions. Data was then time-  
686 locked to the respective baseline (-200 - 0 ms before sample presentation) and  
687 averaged across trials. For a comparison between conditions, we averaged across  
688 sessions (**Fig. S5**).

689

690

691 *Beamformer analysis*

692         We source-localized power differences in frequency bands of interest and their  
693 significant correlation with WM performance (Fig. 3, 4). Cortical sources of the sensor-  
694 level EEG data were reconstructed by using a LCMV (linearly constraint minimum  
695 variance) beamforming approach<sup>20</sup> to estimate the time series for every voxel on the  
696 grid. A standard T1 MRI template and a BEM (boundary element method) headmodel  
697 from the FieldTrip toolbox<sup>19</sup> were used to construct a 3D template grid at 1cm spacing  
698 in standard MNI space. Electrode location were positioned on a standard head and  
699 aligned with MNI space using the FieldTrip toolbox<sup>19</sup>. Prior to source projection, sensor  
700 level data was common average referenced and epoched into 5 second segments. To  
701 minimize computational load, we selected a two second data segment (1 to 3 seconds)  
702 from the delay period of every epoch to construct the covariance matrix. The LCMV  
703 spatial filter was then calculated using the covariance matrix of the sensor-level EEG  
704 data with 5% regularization. Spatial filters were constructed for each of the grid  
705 positions separately to maximally suppress activity from all other sources. The  
706 resulting time courses in source space then underwent spectral analysis using a  
707 Fourier transform using a multitaper approach (*'mtmfft'* of *ft\_freqanalysis* from FieldTrip  
708 using *'dpss'* taper, a smoothing frequency +/- 1 Hz and a 0,5 second moving time  
709 window). For the memory/control comparison, power spectra were averaged across  
710 sessions prior to statistical analysis. Power differences between both memory and  
711 control and well as between memory sessions, and their correlation with behaviour  
712 were then tested using cluster-based permutation approaches employing either  
713 repeated t-tests or correlation (see below for details). The results were calculated at

714 every voxel in source space, converted to z-values and then interpolated onto a  
 715 standard template brain in MNI space.

716 **Supplemental Results**

717

718 *Patient characteristics*

719

720 **Table S1**

|                                           | <b>Pre- and postoperative assessments completed (n=26)</b> | <b>Incomplete assessments (n=15)</b> |
|-------------------------------------------|------------------------------------------------------------|--------------------------------------|
| <b>Age (y)</b>                            | 66 ± 3                                                     | 69 ± 4                               |
| <b>Body Mass Index (kg/m<sup>2</sup>)</b> | 27.6 ± 3.5                                                 | 26.7 ± 3.2                           |
| <b>Obesity</b>                            | 6 (23.1)                                                   | 3 (20.0)                             |
| <b>Hypertension</b>                       | 17 (65.4)                                                  | 6 (40.0)                             |
| <b>Coronary artery disease</b>            | 3 (11.5)                                                   | 1 (6.7)                              |
| <b>Diabetes</b>                           | 1 (3.8)                                                    | 2 (13.3)                             |
| <b>Dyslipoproteineamia</b>                | 8 (30.8)                                                   | 2 (13.3)                             |
| <b>Smoking</b>                            | 4 (15.4)                                                   | 0 (0.0)                              |
| <b>ASA Status</b>                         |                                                            |                                      |
| <i>I</i>                                  | 2 (7.7)                                                    | 0 (0.0)                              |
| <i>II</i>                                 | 24 (92.3)                                                  | 13 (86.7)                            |
| <i>III</i>                                | 0 (0.0)                                                    | 2 (13.3)                             |
| <b>Midazolam</b>                          |                                                            |                                      |
| <i>Yes</i>                                | 13 (50.0)                                                  | 7 (46.7)                             |
| <i>No</i>                                 | 13 (50.0)                                                  | 8 (53.3)                             |
| <b>Sufentanil (µg)</b>                    | 104.0 ± 23.3                                               | 98.2 ± 18.3                          |
| <b>Infused Volume (ml)</b>                | 2981 ± 640                                                 | 2767 ± 704                           |
| <b>Cristalloids (ml)</b>                  | 2865 ± 540                                                 | 2767 ± 704                           |
| <b>Colloids (ml)</b>                      |                                                            |                                      |
| <b>Blood Loss (ml)</b>                    | 408 ± 315                                                  | 503 ± 303                            |
| <b>Surgery Duration (min)</b>             | 225 ± 50                                                   | 206 ± 49                             |
| <b>Anaesthesia Duration (min)</b>         | 275 ± 54                                                   | 261 ± 61                             |
| <b>PACU Length of Stay (min)</b>          | 178 ± 62                                                   | 183 ± 53                             |

721

722 **Characteristics of patients with complete (n=26) and incomplete pre- and postoperative**  
 723 **assessments (n = 15).** ASA – American Society of Anesthesiology Status (1 – no comorbidities, 2 –  
 724 mild systemic disease such as hypertension or diabetes). SD – standard deviation. Data are presented  
 725 as mean ± SD or n (%).

726

727



728 *Behavioural Performance – Neuropsychological Assessment*

729

730 **Table S2**

|                       | Se 1 |    | Se 2 |    | z-score |      |
|-----------------------|------|----|------|----|---------|------|
|                       | Mean | SD | Mean | SD | Mean    | SD   |
| <b>Total recall</b>   | 44   | 9  | 40   | 9  | -0.42   | 0.66 |
| <b>Learning slope</b> | 1    | 0  | 1    | 0  | -0.31   | 0.81 |
| <b>TMT_B (s)</b>      | 80   | 22 | 73   | 20 | -0.17   | 0.54 |
| <b>GPT_dom (s)</b>    | 82   | 8  | 80   | 11 | -0.08   | .055 |
| <b>Digit Span</b>     | 5    | 1  | 5    | 1  | -0.04   | 0.79 |

731

732 **Absolute values and z-scores of neuropsychological assessments (n = 26).** Se – session. TMT –  
733 Trail Making Test. GPT – Grooved-Pegboard Test. dom – dominant. Data are presented as mean ± SD.

734

735 *Behavioural Performance – Working Memory Reaction times*

736 In the WM task, there was no significant influence of condition or session on  
737 reaction times (RT; *repeated-measures ANOVA*: condition  $F_{1,25} = 0.366$ ,  $p = 0.551$ ;  
738 session  $F_{1,25} = 0.008$ ,  $p = 0.928$ ; condition\*session  $F_{1,25} = 0.216$ ,  $p = 0.646$ ; **Table 2**).  
739 However, patients exhibited a tendency to be faster for the non-match than the match  
740 trials (see **Table S2**; *repeated-measures ANOVA*: match  $F_{1,25} = 3.785$ ,  $p = 0.063$ ;  
741 session  $F_{1,25} = 0.141$ ,  $p = 0.710$ ; match\*session  $F_{1,25} = 0.929$ ,  $p = 0.344$ ).

742

743 *Event-related potentials differentiate memory and control conditions*

744 We could identify a total two clusters that marked significant differences on the  
745 group level: One late (*cluster-based permutation t-tests*: 1 to 3.1 s,  $t_1 = -8.87 \cdot 10^4$ ,  $p_1 =$   
746  $0.002$ , 37 channels with a focus on posterior parietal cortex) and one early in the delay  
747 period (reflecting the p300; 0.2 to 1 s,  $t_2 = -4.74 \cdot 10^4$ ,  $p_2 = 0.004$ , 34 CH posterior  
748 parietal) mirrored by two positive ones (early 0.2 to 1 s,  $p_1 = 0.014$ ,  $t_1 = 4.06 \cdot 10^4$ , 43  
749 channels over frontal cortex; late 2.1 to 2.95 s,  $p_2 = 0.016$ ,  $t_2 = 3.27 \cdot 10^4$ , 22 frontal  
750 channels; see **Fig. S5**).

751           When contrasting the ERPs of the post- and pre-anaesthesia memory sessions  
752 (Se2-Se1), there were no significant differences (*cluster-based permutation t-tests*:  
753 one positive cluster of 11 central channels, 0.57 to 0.9 s,  $p = 0.272$ ,  $t = 5.14 \cdot 10^4$ ). Note,  
754 that both the comparison of ERPs of control sessions or the memory-control  
755 differences did not show significant differences as well (Ctrl: positive cluster. 10 central  
756 channels,  $p = 0.296$ ,  $t = 4.68 \cdot 10^3$ ; Difference: positive cluster, 15 central channels,  $p$   
757  $= 0.805$ ,  $t = 2.31 \cdot 10^3$ ; **Fig. S5**).

758

759 **Supplemental Figures**

760

761

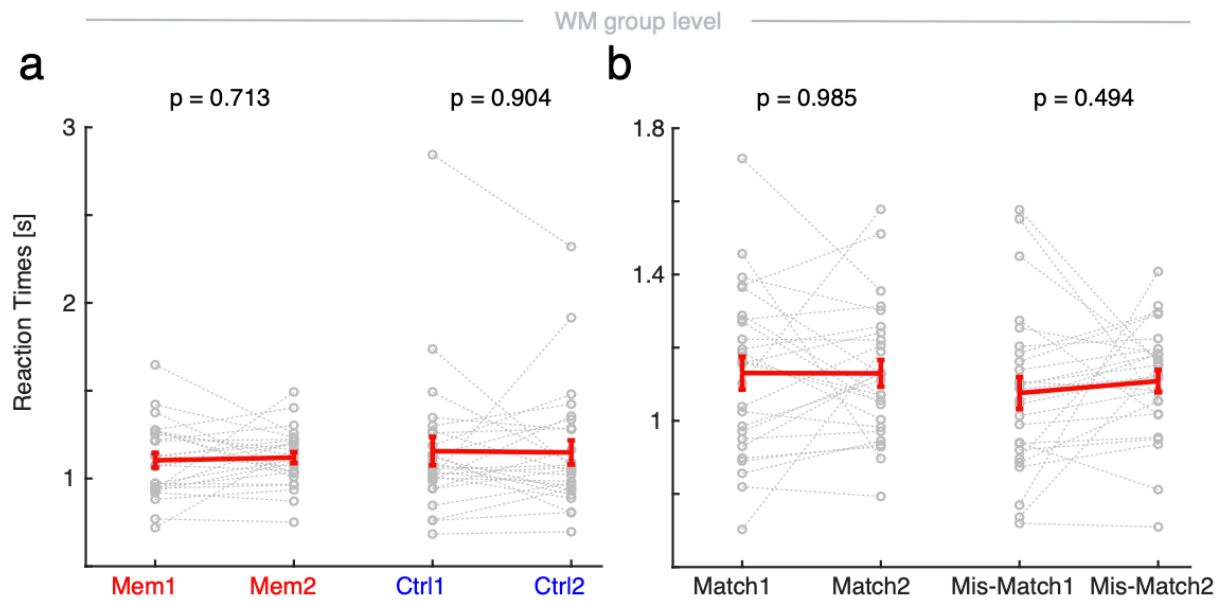

762

763 **Figure S2: Behaviour in the visual working memory task.**

764 **a**, Reaction times in seconds (s) in memory and control condition before (1) and after (2) anaesthesia  
765 (n = 26). *Repeated-measures ANOVA*: condition  $F_{1,25} = 0.366$ ,  $p = 0.551$ ; session  $F_{1,25} = 0.008$ ,  $p =$   
766  $0.928$ ; condition\*session  $F_{1,25} = 0.216$ ,  $p = 0.646$ . Grey dots – single subjects. Red line – mean ± SEM.  
767 P-values *post-hoc uncorrected t-tests*. **b**, Reaction times in seconds (s) between memory sessions in  
768 match and non-match trials. *Repeated-measures ANOVA*: match  $F_{1,25} = 3.785$ ,  $p = 0.063$ ; session  $F_{1,25}$   
769  $= 0.141$ ,  $p = 0.710$ ; match\*session  $F_{1,25} = 0.929$ ,  $p = 0.344$ . Grey dots – single subjects. Red line – mean  
770 ± SEM. P-values *post-hoc uncorrected t-tests*.  
771

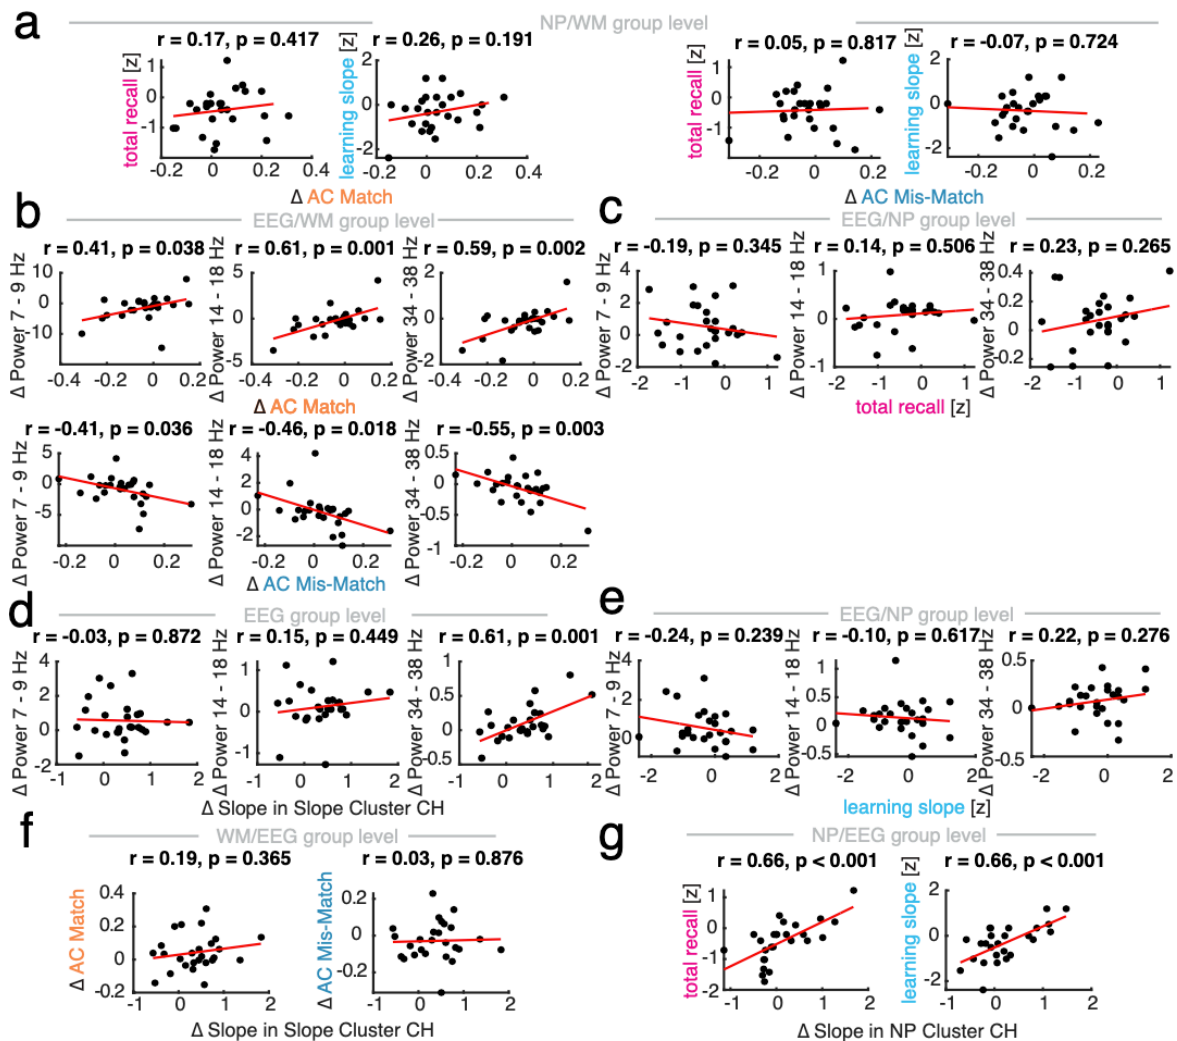

772  
773  
774  
775  
776  
777  
778  
779  
780  
781  
782  
783  
784  
785  
786  
787  
788  
789  
790  
791  
792  
793  
794

**Figure S3: Associations between neuropsychological assessment, working memory performance, oscillatory and aperiodic electrophysiological features.** **a**, Association of neuropsychological (NP) assessment (z-scores of California Verbal Learning Task (CVLT) total recall and learning slope) and session differences in performance between the memory sessions of the working memory (WM) task ( $\Delta$  Se2-Se1,  $n = 26$ ). Left – total recall and learning slope with  $\Delta$  match accuracy; Right –  $\Delta$  mis-match accuracy. **b**, Association of electroencephalogram (EEG) oscillatory power differences between memory sessions in frequency bands of interest ( $\Delta$  Se2-Se1,  $n = 26$ ) and WM  $\Delta$  match and  $\Delta$  mis-match accuracy in cluster channels (*post-hoc correlations*; session differences in spectral power and accuracy *cluster-permutation test*:  $\Delta$  AC match  $p < 0.01$ ,  $\Delta$  AC mis-match  $p = 0.022$ ; **Fig. 4**). **c**, Association of EEG oscillatory power differences between memory sessions in frequency bands of interest ( $\Delta$  Se2-Se1,  $n = 26$ ) and NP z-score of CVLT total recall. **d**, Association of EEG oscillatory power differences between memory sessions in frequency bands of interest ( $\Delta$  Se2-Se1,  $n = 26$ ) and EEG spectral slope (30 – 40 Hz) difference between memory sessions in cluster channels ( $\Delta$  Se2-Se1 spectral slope *cluster-permutation test*:  $p = 0.073$ , **Fig. 5**). **e**, Association of EEG oscillatory power differences between memory sessions in frequency bands of interest ( $\Delta$  Se2-Se1,  $n = 26$ ) and NP z-score of CVLT learning slope (**Fig. 5**). **f**, Association between WM performance and EEG  $\Delta$  spectral slope ( $\Delta$  Se2-Se1,  $n = 26$ ). Left – accuracy in match and Right – accuracy in mis-match discrimination in slope difference cluster channels. **g**, Association between NP performance and EEG  $\Delta$  spectral slope ( $\Delta$  Se2-Se1,  $n = 26$ ). Left – z-score CVLT total recall and Right – z-score CVLT learning slope in NP cluster channels ( $\Delta$  spectral slope and total recall *cluster-permutation test*:  $p = 0.029$ ;  $\Delta$  spectral slope and learning slope *cluster-permutation test*:  $p = 0.015$ ; **Fig. 5**).

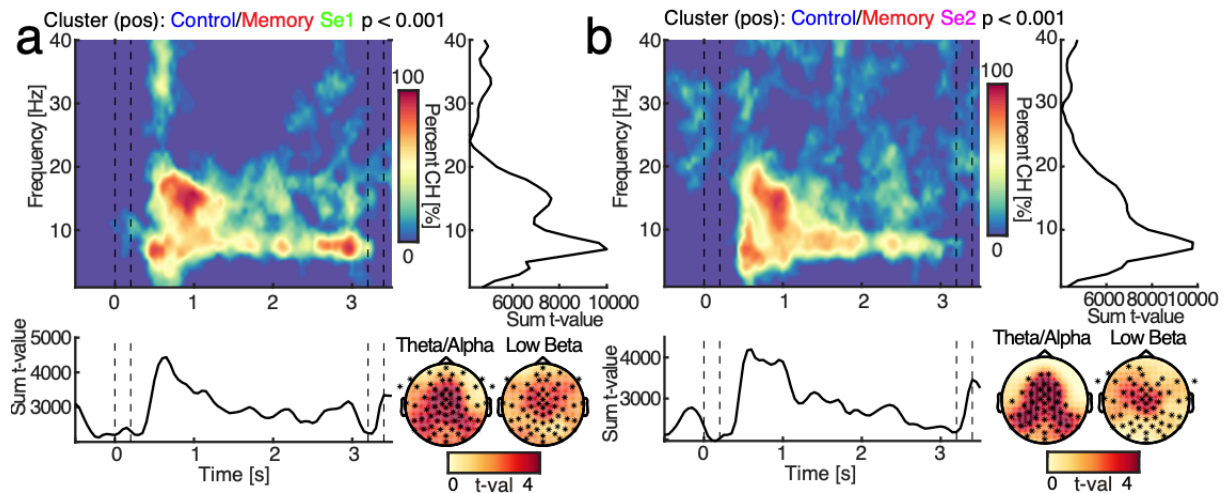

795  
796  
797  
798  
799  
800  
801  
802  
803  
804  
805  
806  
807  
808  
809  
810  
811  
812  
813  
814

**Figure S4: Spectral power changes in pre- and post-anaesthesia session.** Sequence of WM task: blue/S – sample presentation, orange/D – delay, grey/P – probe presentation.  
**a**, Control and memory condition power differences (baseline-corrected) in the pre-anaesthesia session (Se1). Left upper panel – Spectral power changes between control and memory in session 1 ( $p < 0.001$ ,  $n = 26$ ). Colour-coded is the number of channels that are part of the cluster from blue – no channels to red – 100% of channels. Right upper panel – Sum of t-values per frequency. Note the peaks in the theta/alpha (7 – 9 Hz) and low beta (14 – 18 Hz) frequency range. Left middle panel – Sum of t-values per time. Note the increased activity in the theta/alpha band in the control condition, revealing a sustained suppression in the memory session. Right middle panel – spatial extent of spectral power difference between conditions in the theta/alpha and low beta band.  
**b**, Post-(Se2) anaesthesia control and memory condition power differences (baseline-corrected). Left upper panel – Spectral power changes between control and memory in session 2 ( $p < 0.001$ ,  $n = 26$ ). Colour-coded is the number of channels that are part of the cluster from blue – no channels to red – 100% of channels. Right upper panel – Sum of t-values per frequency. Note the peaks in the that/alpha (7-9 Hz) and low beta (14 – 18 Hz) frequency range. Left middle panel – Sum of t-values per time. Right middle panel – spatial extent of condition difference in the theta/alpha (7-9 Hz) and low beta frequency (14 – 18 Hz).

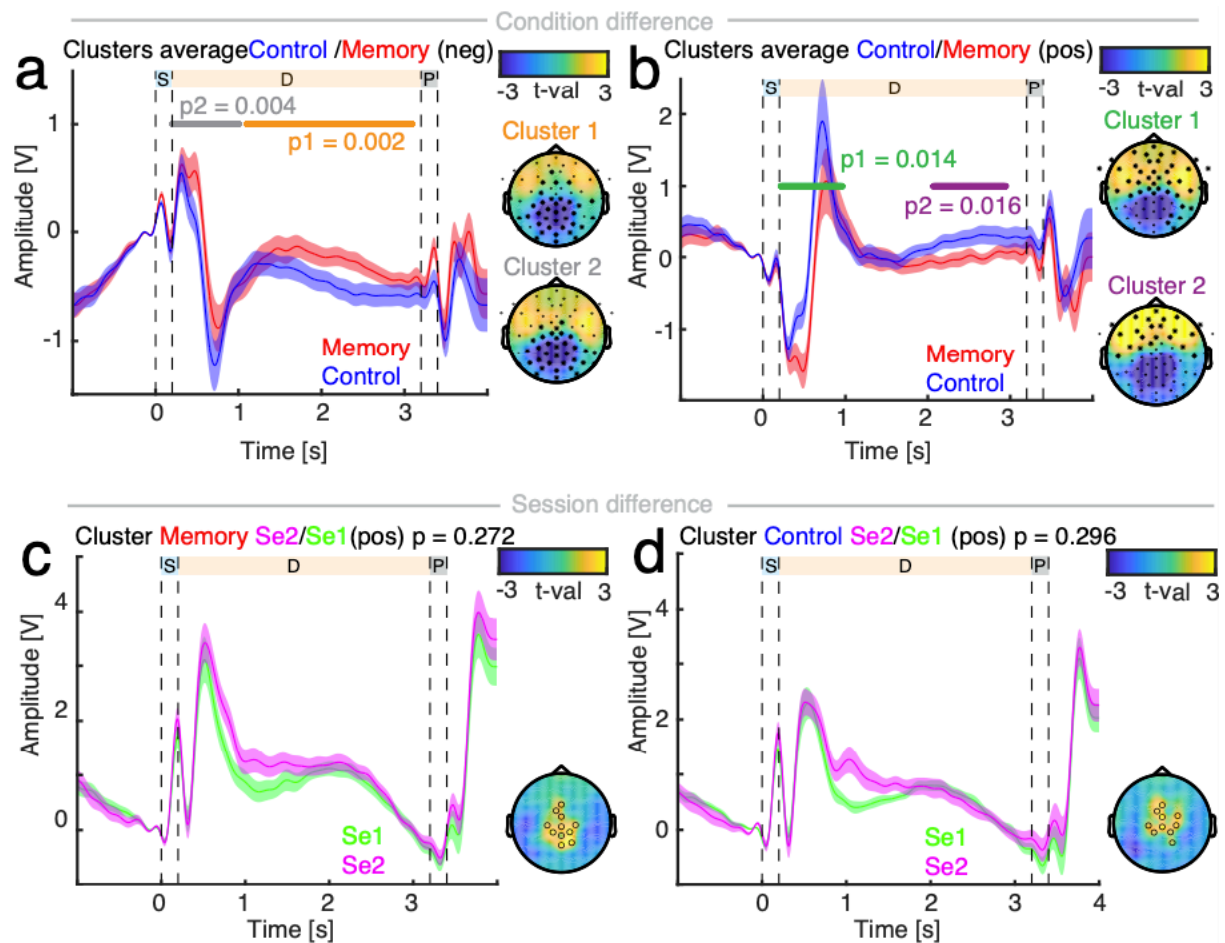

815

816 **Figure S5: Comparison of condition and session Event-related potentials.**

817 Sequence of WM task: blue/S – sample, orange/D – delay, grey/P – probe.

818 **a**, Temporal (left) and spatial (right) extent of condition differences of event-related potentials (ERP)  
 819 between average control (blue) and memory (red;  $n = 26$ ). Two negative, parieto-central clusters were  
 820 significant: First one in delay (orange,  $p = 0.002$ ), second one early (grey,  $p = 0.004$ ) reflecting the ERP.

821 **b**, Temporal (left) and spatial (right) extent of ERP differences between average memory (red) and  
 822 control (blue). Two positive frontal clusters emerged: First one early (green,  $p = 0.014$ ) reflecting the  
 823 ERP, second late in delay (purple,  $p = 0.016$ ). Note the mirrored effect compared to a.

824 **c**, Pre- (green) and post-anaesthesia (magenta) memory sessions did not show significant temporal  
 825 (left) or spatial (right) ERP differences.

826 **d**, Pre- (green) and post-anaesthesia (magenta) control sessions did not show significant temporal (left)  
 827 or spatial (right) ERP differences.

828

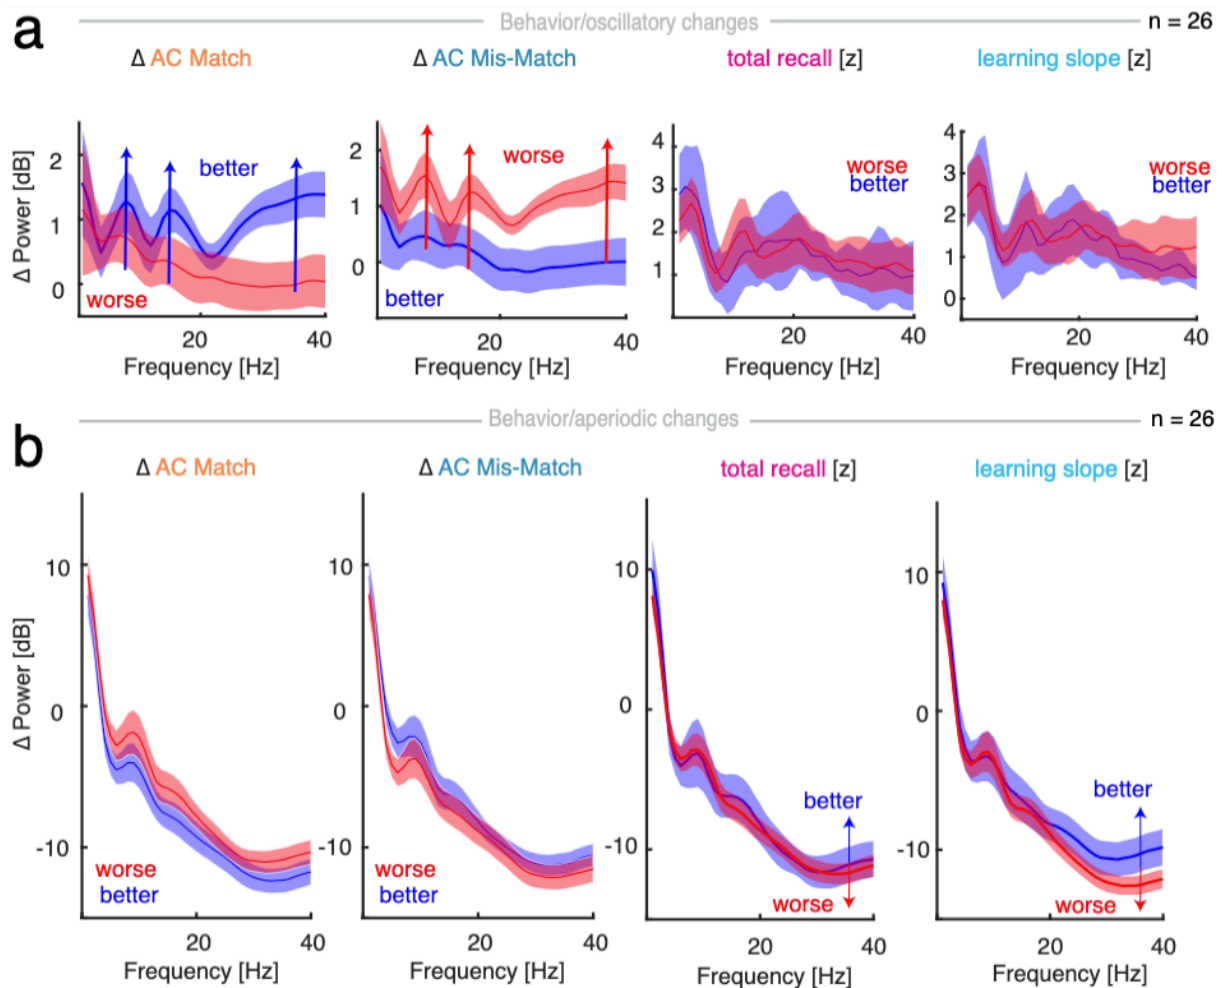

829  
830  
831  
832  
833  
834  
835  
836  
837  
838  
839  
840  
841  
842  
843  
844  
845  
846  
847

**Figure S6: Electrophysiological signatures by median split of cognitive performances.**

**a**, Oscillatory changes: median split of baseline-corrected spectral power differences between post- and pre-anaesthesia sessions ( $\Delta$  Se2 - Se1, n = 26). Left – split by median difference ( $\Delta$  Se1-Se2) of  $\Delta$  accuracy of match discrimination; left middle -  $\Delta$  mis-match discrimination. Note, the power differences in certain frequency bands (theta, low and high beta). Right middle – Power split by median z-score of neuropsychological assessment by the California Verbal Learning Task (CVLT) total recall and right – learning slope. Blue – better performance than median, red – worse performance than median. Note, that there are no relevant oscillatory changes that track NP performance.

**b**, Aperiodic changes: median split of spectral power differences between post- and pre-anaesthesia memory sessions ( $\Delta$  Se2 - Se1, n = 26). Left – Power split by median difference ( $\Delta$  Se1-Se2) of accuracy of match; left middle – mis-match discrimination. Right middle – Power split by median z-score of neuropsychological assessment by CVLT total recall and right – learning slope. Note, the diverging steepness of the power spectrum above 30 Hz compared to the accuracy difference splits. Blue – better performance than median, red – worse performance than median.
